# Supplementary material for: Development of a high-throughput flexible quantitative suspension array assay for IgG against multiple Plasmodium falciparum antigens
Source: Springer Nature journal article supplement (doi:10.1186/s12936-018-2365-7), 2018-05-29

# Correlation Intra-plate 1 AU/mL

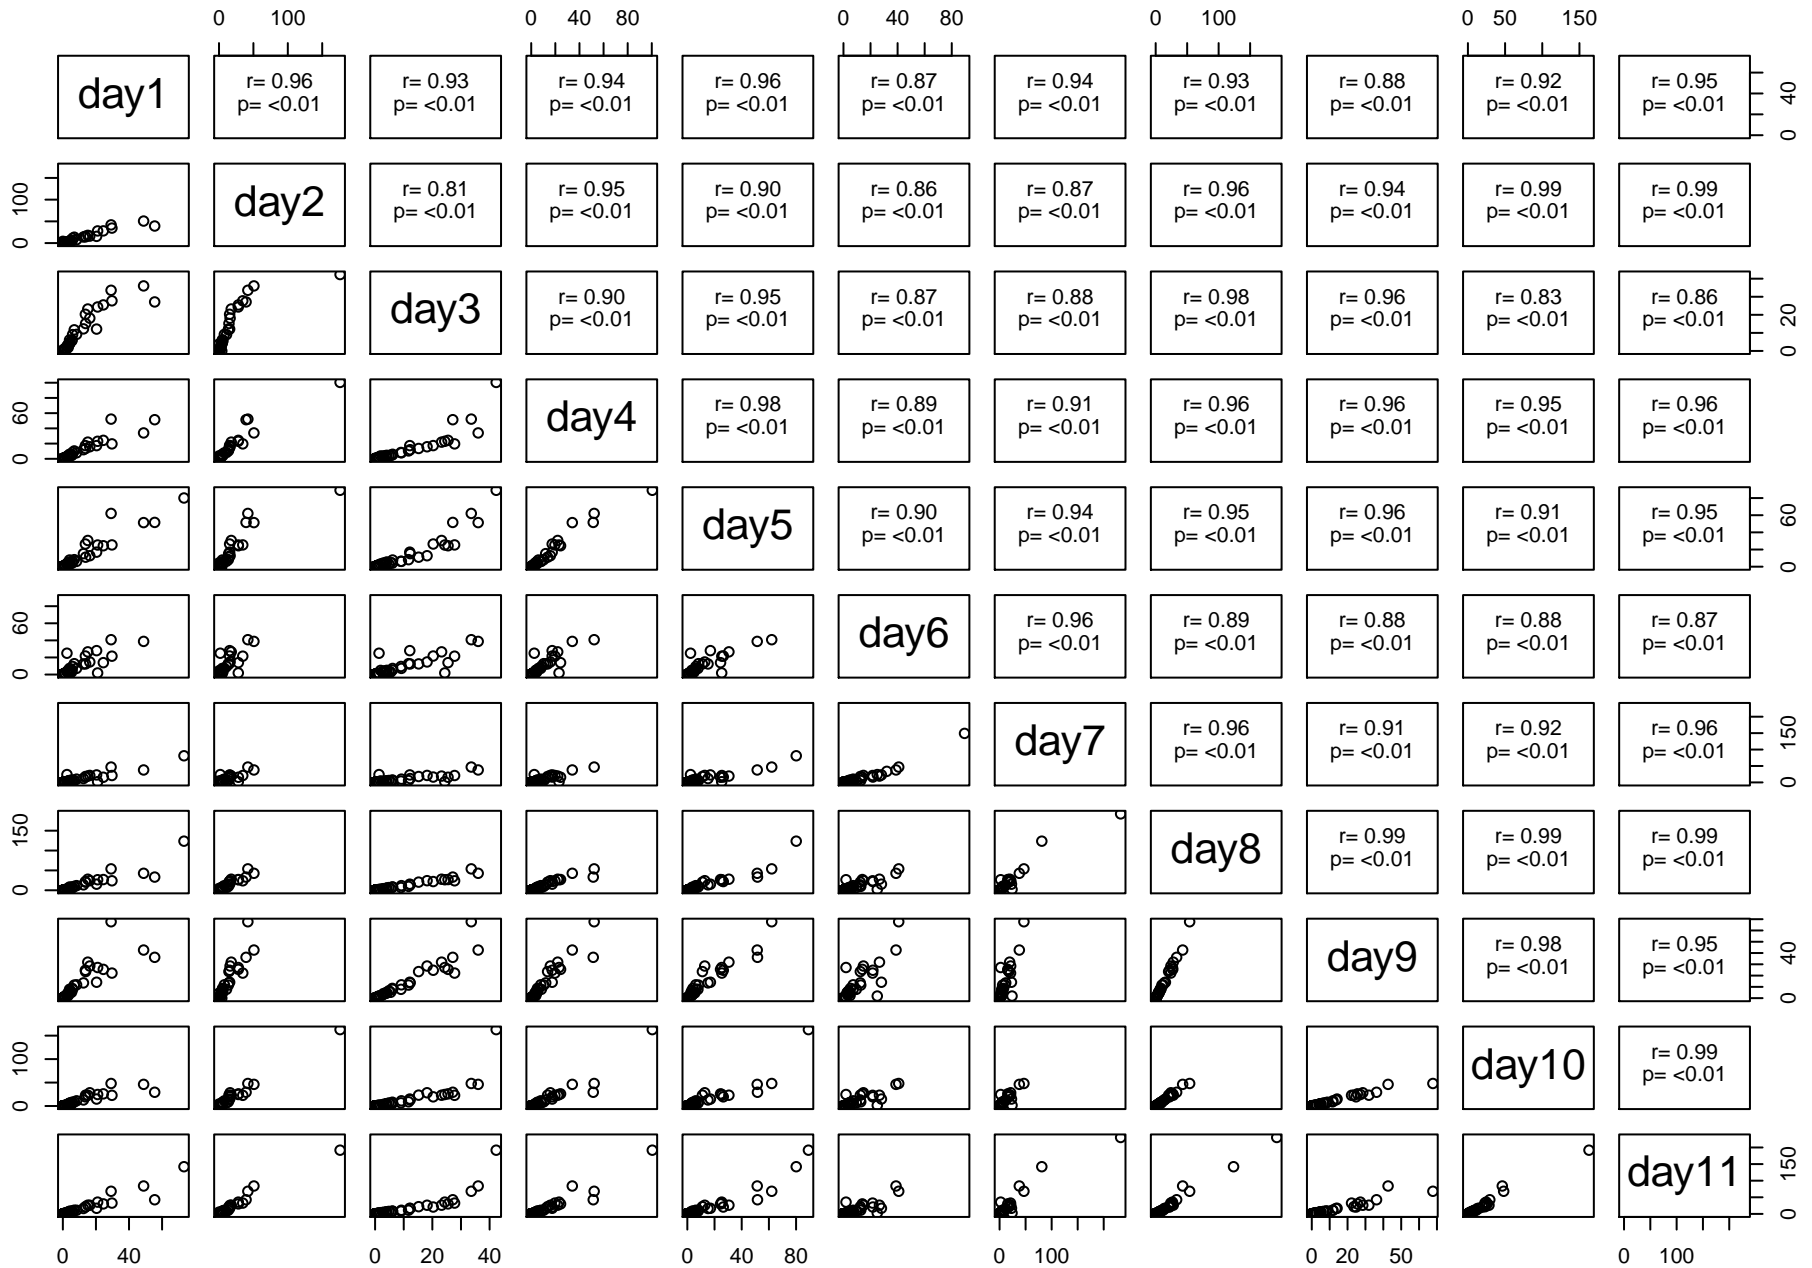

# Correlation Intra-plate 2 AU/mL

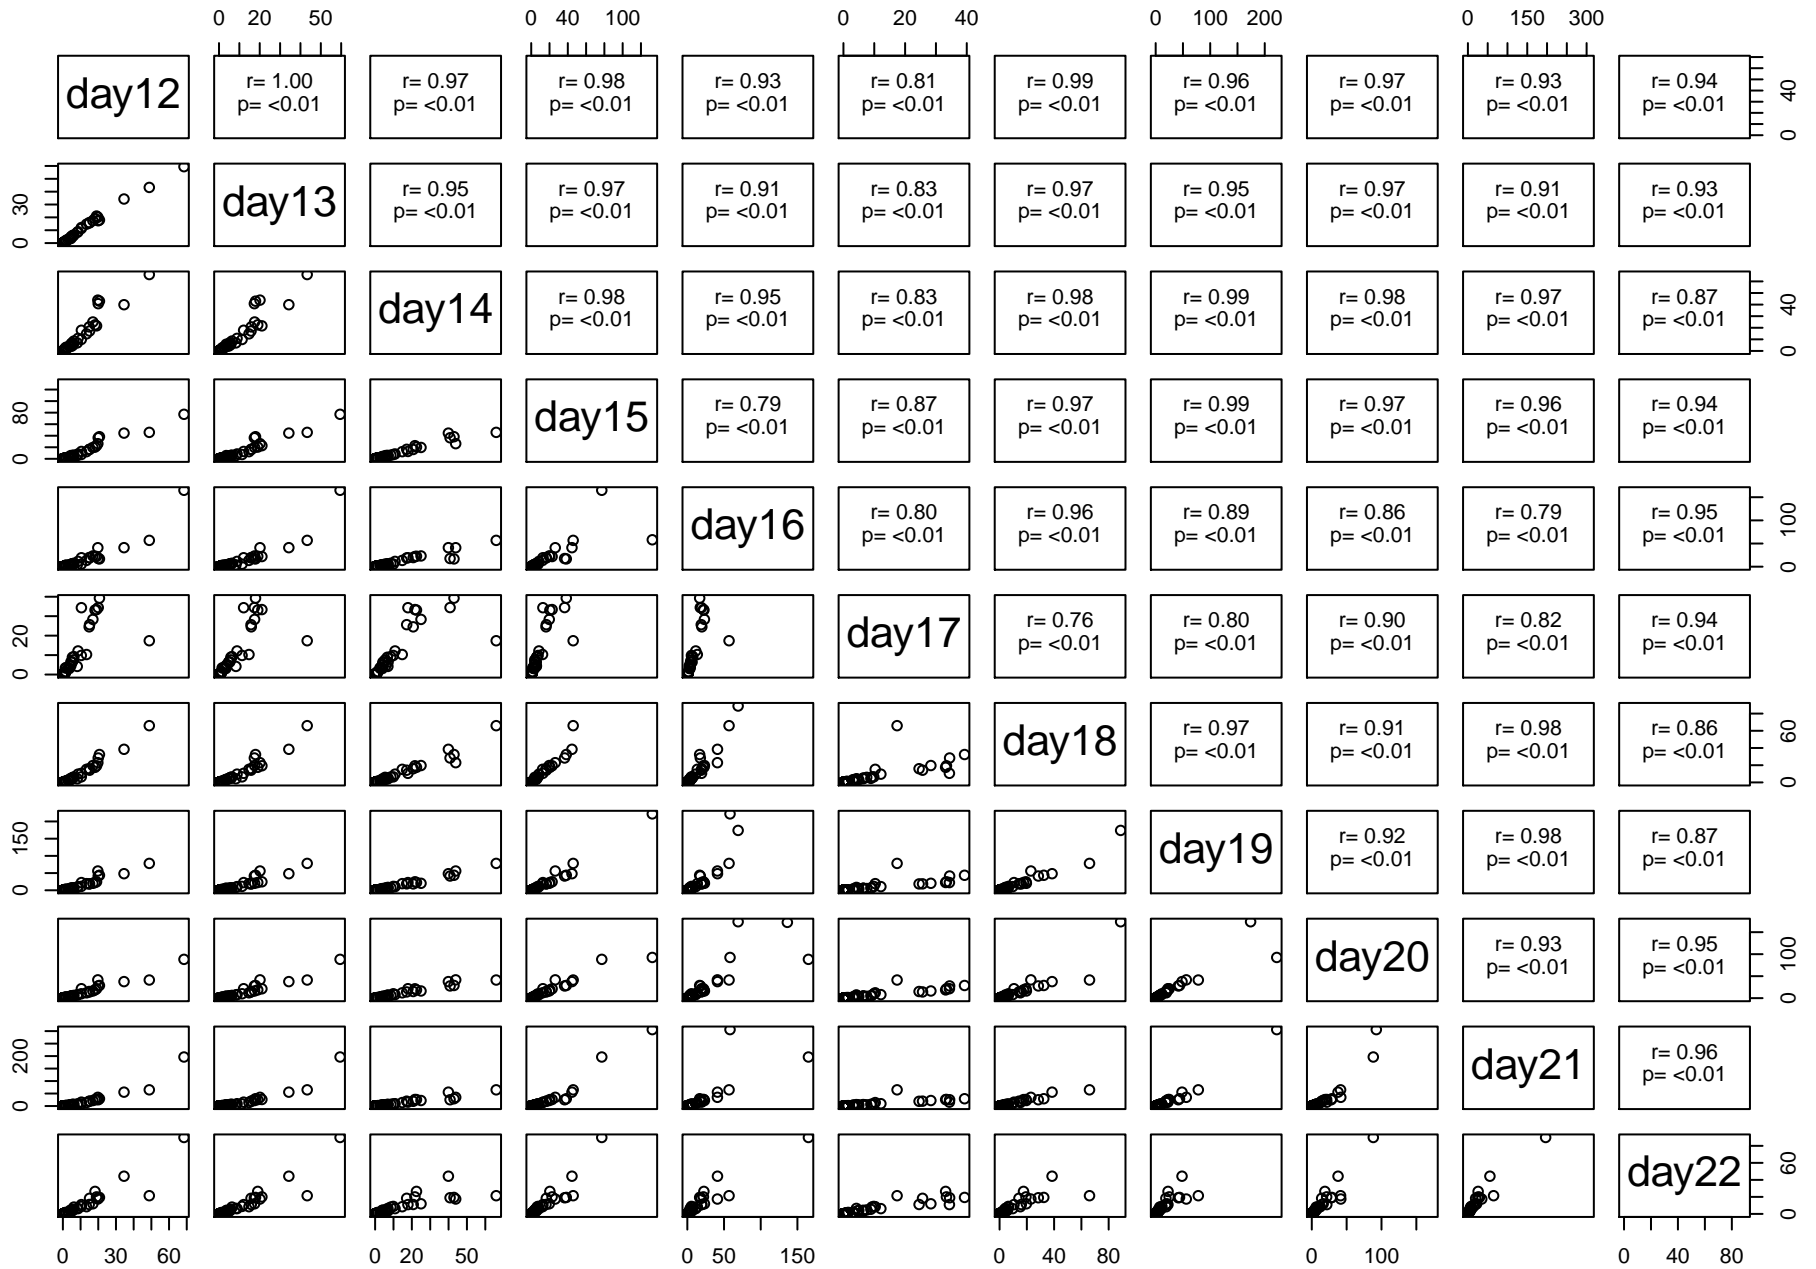

Supplement: MOESM1 [file 15800670]
